# Supplementary material for: Is It Reliable to Take the Molecular Docking Top Scoring Position as the Best Solution without Considering Available Structural Data?
Source: MDPI journal article supplement (doi:10.3390/molecules23051038), 2018-04-28
Supplement: s1 [file s1]

## Supplementary material

# Is It Reliable to Take the Molecular Docking Top Scoring Position as the Best Solution without Considering Available Structural Data?

David Ramírez <sup>1</sup> and Julio Caballero <sup>2,\*</sup>

<sup>1</sup> Instituto de Ciencias Biomédicas, Universidad Autónoma de Chile, 5 Poniente No. 1670, 3460000, Talca, Chile, david.ramirez@uautonoma.cl

<sup>2</sup> Centro de Bioinformática y Simulación Molecular (CBSM), Universidad de Talca. 1 Poniente No. 1141, 3460000, Talca, Chile.

\* Correspondence: jcaballero@utalca.cl; Tel.: +56-712-418-850

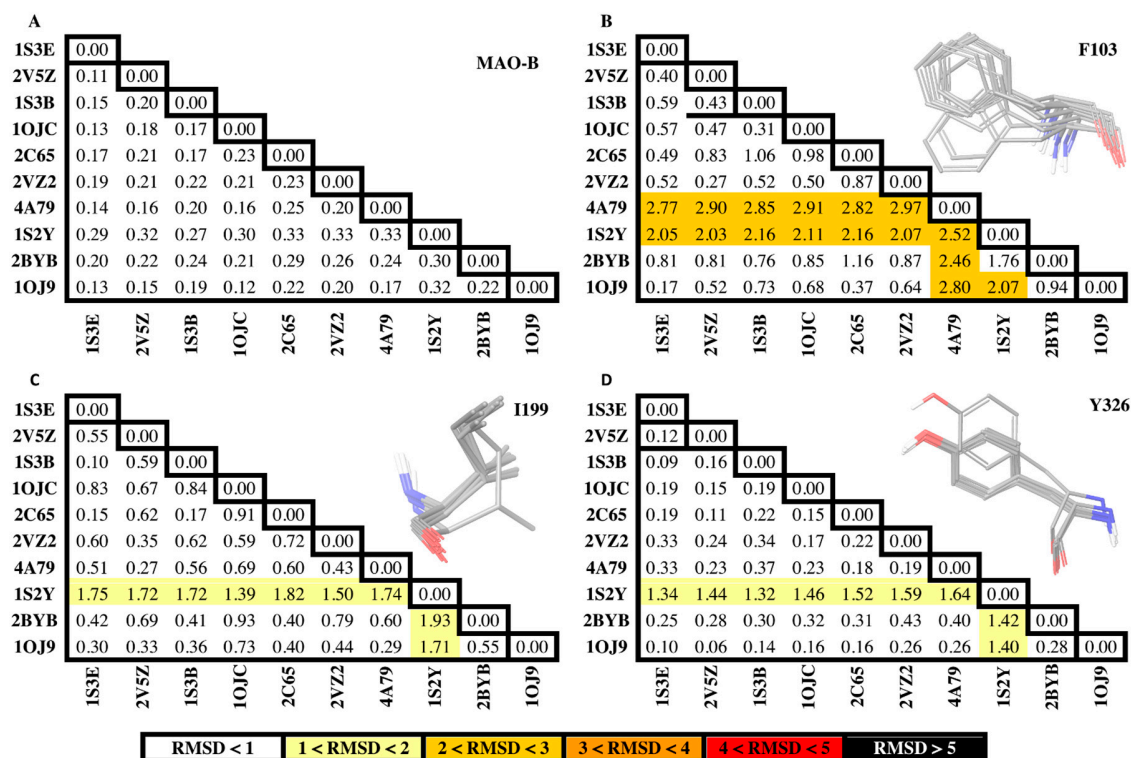

**Figure S1.** RMSD values (in Å) of different MAO-B crystallographic structures (A), and of their residues F103 (B), I199 (C) and Y326 (D). Conformations of residues are represented to the right.

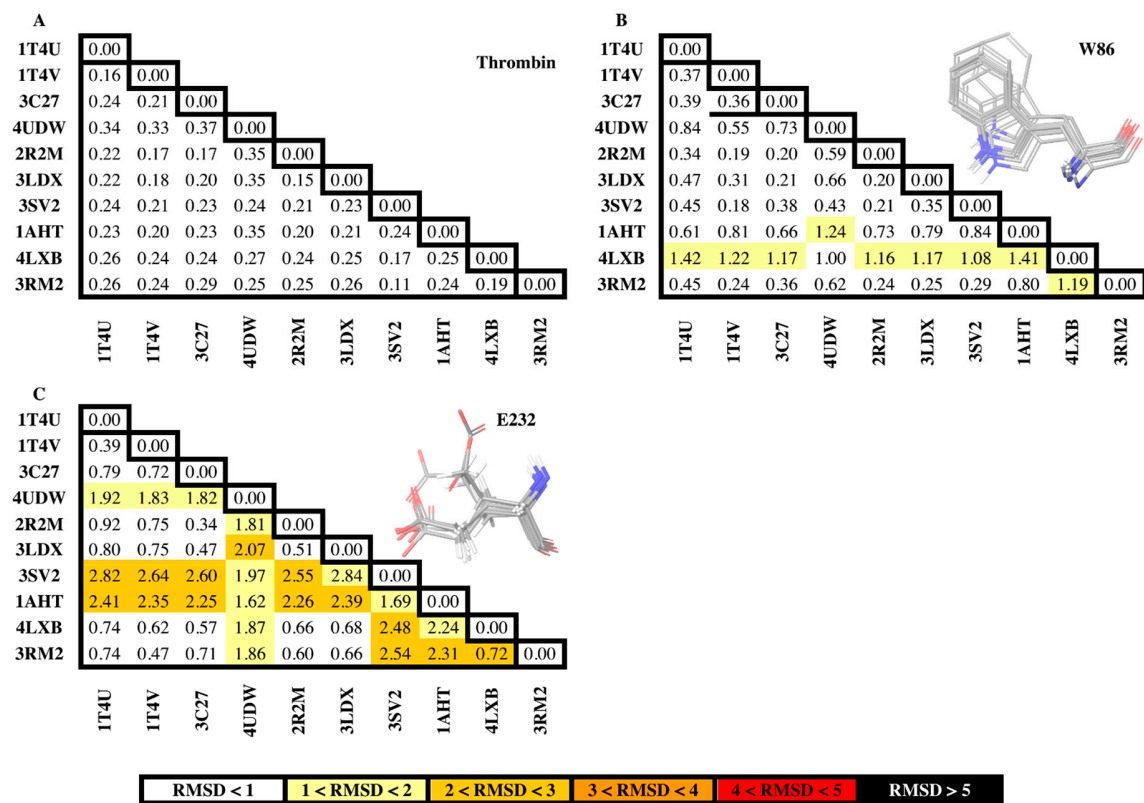

**Figure S2.** RMSD values (in Å) of different thrombin crystallographic structures (A), and of their residues W86 (B) and E232 (D). Conformations of residues are represented to the right.

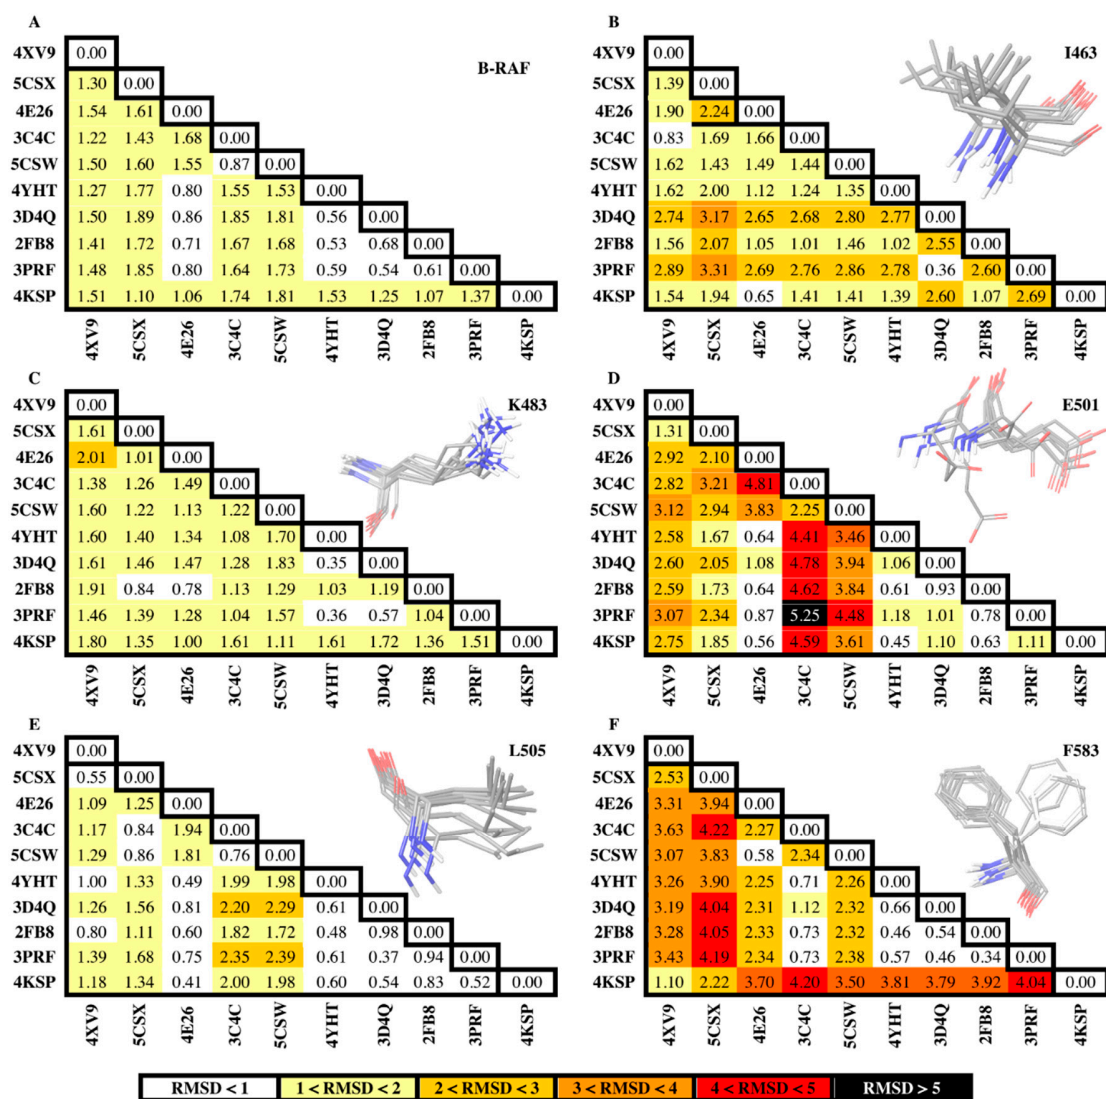

**Figure S3.** RMSD values (in Å) of different B-RAF crystallographic structures (A), and of their residues I463 (B), K483 (C), E501 (D), L505 (E) and F583 (F). Conformations of residues are represented to the right.
